# Supplementary material for: Genetic Diversity and Combining Ability of White Maize Inbred Lines under Different Plant Densities
Source: PubMed Central journal article supplement (PMC7570016; doi:10.3390/plants9091140), 2020-09-03
Supplement: plants-09-01140-s001.pdf [file plants-09-01140-s001.pdf]

**Table S1. Mean performance of the 28 F<sub>1</sub> crosses and the check hybrid SC128 for all the studied traits under the three plant densities across the two locations.**

| Cross                          | DTS   |       |       | ASI  |      |      | PLHT   |        |        | EHT    |        |        | LANG  |       |       | CHLC  |       |       |
|--------------------------------|-------|-------|-------|------|------|------|--------|--------|--------|--------|--------|--------|-------|-------|-------|-------|-------|-------|
|                                | D1    | D2    | D3    | D1   | D2   | D3   | D1     | D2     | D3     | D1     | D2     | D3     | D1    | D2    | D3    | D1    | D2    | D3    |
| L <sub>1</sub> ×L <sub>2</sub> | 57.17 | 60.27 | 64.10 | 2.80 | 3.29 | 4.63 | 240.50 | 244.50 | 264.87 | 143.00 | 147.00 | 155.00 | 33.50 | 32.60 | 30.55 | 50.18 | 48.27 | 45.50 |
| L <sub>1</sub> ×L <sub>3</sub> | 56.17 | 58.95 | 62.85 | 3.27 | 4.22 | 5.13 | 231.75 | 238.00 | 247.35 | 132.09 | 140.50 | 144.76 | 40.25 | 38.23 | 36.05 | 49.50 | 48.00 | 46.00 |
| L <sub>1</sub> ×L <sub>4</sub> | 56.50 | 59.00 | 62.52 | 3.28 | 3.65 | 4.60 | 210.50 | 225.90 | 252.60 | 136.23 | 138.13 | 144.16 | 26.55 | 24.80 | 22.00 | 48.50 | 44.00 | 40.20 |
| L <sub>1</sub> ×L <sub>5</sub> | 58.85 | 61.20 | 64.60 | 2.73 | 3.07 | 4.00 | 238.00 | 241.00 | 276.20 | 133.38 | 136.20 | 138.39 | 28.25 | 26.00 | 22.25 | 52.00 | 49.00 | 48.80 |
| L <sub>1</sub> ×L <sub>6</sub> | 57.50 | 60.80 | 63.58 | 3.55 | 3.83 | 4.77 | 230.50 | 237.50 | 256.80 | 125.39 | 131.35 | 135.45 | 29.25 | 27.00 | 26.25 | 50.30 | 48.60 | 46.50 |
| L <sub>1</sub> ×L <sub>7</sub> | 57.90 | 62.00 | 65.10 | 2.47 | 2.75 | 3.64 | 266.50 | 268.25 | 271.35 | 110.17 | 118.39 | 125.36 | 30.55 | 27.53 | 25.62 | 51.23 | 50.13 | 47.53 |
| L <sub>1</sub> ×L <sub>8</sub> | 57.70 | 60.00 | 64.60 | 3.14 | 3.39 | 4.21 | 218.40 | 225.70 | 250.85 | 105.50 | 114.84 | 118.11 | 35.25 | 31.70 | 28.12 | 50.73 | 49.80 | 47.37 |
| L <sub>2</sub> ×L <sub>3</sub> | 58.50 | 62.30 | 65.68 | 4.15 | 4.50 | 5.35 | 258.00 | 279.50 | 286.59 | 118.12 | 123.00 | 129.07 | 38.50 | 36.60 | 34.75 | 50.23 | 47.80 | 46.03 |
| L <sub>2</sub> ×L <sub>4</sub> | 56.50 | 59.42 | 63.40 | 3.37 | 4.33 | 4.91 | 282.45 | 290.63 | 293.70 | 118.67 | 127.75 | 134.30 | 29.65 | 27.60 | 25.75 | 50.90 | 49.63 | 46.53 |
| L <sub>2</sub> ×L <sub>5</sub> | 60.50 | 60.75 | 64.25 | 2.15 | 2.28 | 3.12 | 224.00 | 232.91 | 246.80 | 108.30 | 115.00 | 127.28 | 28.75 | 28.20 | 26.95 | 52.23 | 50.80 | 47.53 |
| L <sub>2</sub> ×L <sub>6</sub> | 58.50 | 62.48 | 67.05 | 3.65 | 3.85 | 4.65 | 203.17 | 206.00 | 213.35 | 105.00 | 109.49 | 116.42 | 32.25 | 28.37 | 29.52 | 53.23 | 48.00 | 45.00 |
| L <sub>2</sub> ×L <sub>7</sub> | 56.90 | 60.00 | 66.35 | 2.70 | 2.90 | 3.86 | 242.50 | 248.00 | 255.75 | 115.40 | 129.29 | 132.24 | 36.35 | 34.37 | 33.77 | 51.07 | 50.80 | 47.37 |
| L <sub>2</sub> ×L <sub>8</sub> | 57.50 | 61.00 | 63.40 | 2.35 | 2.74 | 3.59 | 223.45 | 226.70 | 236.50 | 107.44 | 118.00 | 125.06 | 27.60 | 25.70 | 24.12 | 54.50 | 53.13 | 50.20 |
| L <sub>3</sub> ×L <sub>4</sub> | 57.95 | 58.50 | 64.60 | 2.75 | 2.78 | 3.39 | 239.30 | 257.00 | 268.45 | 119.12 | 128.40 | 132.00 | 31.60 | 30.70 | 30.45 | 52.40 | 51.47 | 48.53 |
| L <sub>3</sub> ×L <sub>5</sub> | 56.50 | 60.00 | 62.85 | 4.00 | 4.50 | 5.25 | 238.00 | 247.65 | 255.60 | 106.15 | 116.00 | 123.00 | 40.70 | 39.20 | 36.25 | 46.91 | 43.50 | 40.20 |
| L <sub>3</sub> ×L <sub>6</sub> | 58.50 | 60.75 | 67.60 | 3.47 | 3.78 | 4.58 | 233.10 | 234.90 | 252.58 | 104.32 | 112.67 | 125.28 | 34.45 | 34.20 | 33.28 | 47.07 | 42.00 | 39.69 |
| L <sub>3</sub> ×L <sub>7</sub> | 59.00 | 62.50 | 65.40 | 4.65 | 5.20 | 5.65 | 228.20 | 243.50 | 254.57 | 116.35 | 118.28 | 123.00 | 45.35 | 42.30 | 39.05 | 50.63 | 48.60 | 43.00 |
| L <sub>3</sub> ×L <sub>8</sub> | 56.50 | 60.00 | 62.60 | 3.14 | 3.70 | 4.79 | 230.00 | 236.45 | 248.78 | 105.44 | 113.00 | 133.33 | 39.65 | 36.20 | 34.85 | 48.50 | 43.70 | 41.23 |
| L <sub>4</sub> ×L <sub>5</sub> | 56.90 | 60.80 | 63.90 | 2.45 | 2.80 | 3.63 | 252.50 | 273.88 | 292.53 | 113.44 | 119.14 | 131.13 | 25.70 | 24.40 | 22.55 | 51.33 | 46.00 | 42.12 |
| L <sub>4</sub> ×L <sub>6</sub> | 58.50 | 63.75 | 66.60 | 3.89 | 4.50 | 4.96 | 266.30 | 289.00 | 293.10 | 112.80 | 125.63 | 138.23 | 37.60 | 37.20 | 34.95 | 47.31 | 46.00 | 40.00 |
| L <sub>4</sub> ×L <sub>7</sub> | 56.80 | 60.00 | 64.70 | 3.59 | 3.74 | 4.71 | 283.00 | 289.75 | 304.35 | 120.39 | 131.50 | 139.13 | 29.25 | 26.90 | 24.75 | 48.87 | 46.87 | 41.02 |
| L <sub>4</sub> ×L <sub>8</sub> | 59.25 | 62.80 | 66.90 | 3.26 | 3.42 | 4.37 | 256.00 | 262.79 | 272.40 | 112.24 | 128.22 | 135.17 | 34.45 | 34.03 | 33.28 | 51.50 | 46.50 | 43.50 |
| L <sub>5</sub> ×L <sub>6</sub> | 60.50 | 63.00 | 64.10 | 3.65 | 3.85 | 4.79 | 221.50 | 229.00 | 243.20 | 113.33 | 120.13 | 130.39 | 34.45 | 32.70 | 30.45 | 53.60 | 48.60 | 45.30 |
| L <sub>5</sub> ×L <sub>7</sub> | 58.80 | 63.15 | 65.90 | 2.72 | 3.17 | 4.26 | 241.48 | 248.50 | 253.25 | 118.13 | 121.00 | 122.27 | 38.60 | 36.87 | 35.75 | 50.60 | 46.20 | 42.50 |
| L <sub>5</sub> ×L <sub>8</sub> | 58.50 | 61.00 | 64.85 | 3.35 | 3.50 | 5.05 | 238.25 | 249.92 | 258.36 | 106.00 | 110.13 | 118.23 | 37.25 | 35.00 | 32.25 | 52.50 | 46.60 | 43.60 |
| L <sub>6</sub> ×L <sub>7</sub> | 59.50 | 61.00 | 67.10 | 4.48 | 4.95 | 5.45 | 231.50 | 241.45 | 287.40 | 144.14 | 151.23 | 160.29 | 38.25 | 35.00 | 33.25 | 49.40 | 48.60 | 40.22 |
| L <sub>6</sub> ×L <sub>8</sub> | 61.50 | 65.00 | 65.75 | 4.10 | 4.50 | 5.25 | 241.80 | 251.50 | 261.43 | 127.27 | 138.30 | 143.15 | 36.25 | 32.00 | 31.25 | 48.46 | 47.50 | 41.51 |
| L <sub>7</sub> ×L <sub>8</sub> | 58.50 | 61.00 | 65.00 | 2.41 | 3.89 | 5.13 | 247.30 | 254.99 | 275.37 | 118.18 | 126.20 | 134.29 | 29.50 | 27.30 | 25.65 | 44.37 | 41.80 | 39.39 |
| Check<br>SC128                 | 61.00 | 63.00 | 64.00 | 3.05 | 3.68 | 4.60 | 245.45 | 252.00 | 268.00 | 122.00 | 136.00 | 143.00 | 37.25 | 35.40 | 32.47 | 52.00 | 48.20 | 46.30 |
| LSD 5%                         | 1.02  |       |       | 0.42 |      |      | 10.38  |        |        | 7.36   |        |        | 1.86  |       |       | 1.57  |       |       |
| LSD 1%                         | 1.34  |       |       | 0.55 |      |      | 13.66  |        |        | 9.69   |        |        | 2.44  |       |       | 2.07  |       |       |

Table S1. Cont.

| Cross          | ED   |      |      | NRPE  |       |       | NKPR  |       |       | TKW    |        |        | GYPP   |        |        | GYPH  |       |       |
|----------------|------|------|------|-------|-------|-------|-------|-------|-------|--------|--------|--------|--------|--------|--------|-------|-------|-------|
|                | D1   | D2   | D3   | D1    | D2    | D3    | D1    | D2    | D3    | D1     | D2     | D3     | D1     | D2     | D3     | D1    | D2    | D3    |
| L1×L2          | 5.27 | 4.60 | 4.30 | 15.00 | 14.50 | 14.00 | 40.40 | 37.67 | 32.87 | 400.00 | 372.00 | 340.00 | 200.53 | 180.30 | 156.25 | 11.93 | 12.87 | 13.02 |
| L1×L3          | 5.48 | 5.15 | 4.50 | 13.25 | 12.80 | 12.18 | 39.00 | 36.95 | 33.76 | 354.00 | 340.00 | 314.00 | 180.57 | 156.81 | 135.75 | 10.74 | 11.20 | 11.31 |
| L1×L4          | 5.65 | 5.00 | 5.00 | 15.00 | 14.70 | 14.13 | 40.00 | 38.13 | 32.87 | 402.00 | 374.00 | 353.00 | 152.52 | 140.61 | 123.85 | 9.08  | 10.04 | 10.32 |
| L1×L5          | 4.85 | 4.80 | 4.73 | 15.50 | 15.20 | 14.70 | 35.20 | 34.00 | 31.67 | 335.00 | 321.00 | 305.50 | 190.44 | 177.01 | 159.25 | 11.33 | 12.64 | 13.27 |
| L1×L6          | 5.10 | 4.90 | 4.70 | 14.65 | 13.80 | 13.43 | 42.00 | 40.30 | 37.10 | 388.00 | 371.00 | 353.50 | 200.53 | 180.00 | 157.25 | 11.93 | 12.85 | 13.10 |
| L1×L7          | 4.70 | 4.60 | 4.30 | 14.20 | 14.00 | 13.60 | 39.60 | 35.00 | 32.50 | 349.00 | 325.00 | 306.50 | 157.67 | 136.00 | 118.05 | 9.38  | 9.71  | 9.83  |
| L1×L8          | 5.80 | 4.80 | 4.70 | 15.20 | 14.30 | 14.20 | 42.00 | 37.60 | 33.47 | 335.00 | 321.00 | 296.50 | 170.48 | 156.20 | 139.25 | 10.14 | 11.15 | 11.60 |
| L2×L3          | 5.20 | 4.90 | 4.00 | 15.20 | 14.60 | 14.40 | 44.90 | 38.00 | 30.29 | 344.00 | 331.00 | 313.50 | 155.46 | 140.00 | 126.25 | 9.25  | 10.00 | 10.52 |
| L2×L4          | 4.80 | 4.20 | 3.60 | 14.30 | 14.00 | 13.70 | 39.00 | 36.80 | 33.40 | 368.00 | 343.00 | 306.00 | 179.62 | 175.50 | 157.75 | 10.69 | 12.53 | 13.14 |
| L2×L5          | 5.60 | 5.00 | 4.80 | 16.40 | 15.00 | 14.20 | 40.26 | 38.68 | 34.67 | 393.00 | 368.50 | 328.50 | 220.59 | 200.00 | 172.25 | 13.13 | 14.28 | 14.35 |
| L2×L6          | 5.00 | 4.50 | 4.20 | 14.62 | 13.30 | 12.60 | 37.00 | 35.00 | 32.75 | 350.00 | 332.00 | 317.00 | 140.44 | 130.00 | 112.25 | 8.36  | 9.28  | 9.35  |
| L2×L7          | 5.50 | 5.00 | 4.80 | 14.80 | 13.50 | 13.20 | 43.70 | 38.70 | 35.77 | 340.00 | 310.00 | 282.00 | 161.66 | 142.00 | 118.75 | 9.62  | 10.14 | 9.89  |
| L2×L8          | 5.40 | 4.70 | 4.20 | 15.62 | 15.00 | 14.45 | 45.10 | 42.00 | 37.95 | 405.00 | 370.00 | 335.50 | 236.45 | 215.01 | 187.44 | 14.07 | 15.35 | 15.61 |
| L3×L4          | 5.00 | 4.80 | 4.60 | 13.80 | 12.30 | 12.20 | 40.90 | 36.40 | 32.87 | 355.00 | 333.00 | 286.00 | 169.43 | 157.80 | 126.16 | 10.08 | 11.27 | 10.51 |
| L3×L5          | 5.00 | 5.00 | 4.60 | 14.00 | 13.50 | 13.20 | 42.30 | 38.30 | 31.92 | 365.00 | 334.00 | 320.00 | 143.70 | 122.91 | 106.25 | 8.55  | 8.78  | 8.85  |
| L3×L6          | 4.80 | 4.70 | 4.80 | 15.30 | 14.00 | 13.70 | 40.30 | 36.20 | 31.37 | 330.00 | 324.00 | 312.00 | 154.94 | 135.29 | 123.95 | 9.22  | 9.66  | 10.33 |
| L3×L7          | 5.00 | 4.60 | 4.30 | 13.00 | 12.80 | 12.60 | 38.60 | 36.30 | 31.67 | 317.00 | 298.00 | 288.00 | 130.88 | 132.40 | 103.75 | 7.79  | 9.45  | 8.78  |
| L3×L8          | 5.50 | 5.00 | 4.60 | 14.70 | 14.00 | 12.20 | 39.60 | 35.00 | 31.87 | 315.00 | 304.00 | 288.00 | 145.27 | 122.71 | 113.14 | 8.64  | 8.76  | 9.42  |
| L4×L5          | 5.30 | 4.90 | 4.30 | 15.31 | 14.26 | 13.39 | 37.60 | 35.90 | 32.87 | 385.00 | 363.00 | 344.00 | 203.05 | 175.90 | 152.25 | 12.08 | 12.56 | 12.68 |
| L4×L6          | 5.20 | 4.80 | 4.40 | 15.30 | 14.00 | 13.20 | 40.00 | 37.90 | 30.87 | 360.00 | 336.00 | 324.00 | 141.70 | 136.40 | 120.05 | 8.43  | 9.74  | 10.00 |
| L4×L7          | 5.00 | 4.45 | 4.20 | 15.00 | 13.30 | 13.10 | 42.00 | 39.00 | 32.57 | 329.00 | 301.00 | 278.00 | 173.42 | 154.61 | 127.85 | 10.32 | 11.04 | 10.65 |
| L4×L8          | 5.40 | 5.00 | 4.60 | 15.70 | 13.00 | 12.70 | 38.30 | 36.85 | 31.07 | 328.00 | 300.00 | 281.00 | 136.24 | 132.00 | 125.55 | 8.11  | 9.42  | 10.46 |
| L5×L6          | 4.80 | 4.50 | 4.00 | 15.00 | 13.20 | 13.21 | 39.90 | 37.80 | 34.40 | 318.00 | 291.00 | 276.50 | 140.44 | 134.91 | 118.36 | 8.36  | 9.63  | 9.86  |
| L5×L7          | 5.00 | 4.60 | 4.20 | 13.60 | 12.80 | 12.25 | 37.70 | 35.40 | 30.47 | 344.00 | 311.00 | 276.00 | 167.33 | 152.40 | 136.45 | 9.96  | 10.88 | 11.37 |
| L5×L8          | 5.00 | 4.70 | 4.30 | 16.30 | 15.00 | 13.54 | 40.00 | 36.00 | 31.87 | 350.00 | 320.50 | 280.00 | 155.57 | 130.00 | 117.25 | 9.26  | 9.28  | 9.77  |
| L6×L7          | 5.00 | 4.50 | 4.00 | 14.70 | 14.00 | 13.40 | 43.30 | 40.00 | 35.93 | 374.00 | 346.00 | 318.00 | 174.26 | 155.01 | 142.85 | 10.37 | 11.07 | 11.90 |
| L6×L8          | 4.90 | 4.80 | 4.60 | 15.00 | 14.60 | 13.50 | 37.40 | 36.00 | 32.07 | 336.00 | 312.00 | 288.50 | 145.06 | 130.00 | 117.25 | 8.63  | 9.28  | 9.77  |
| L7×L8          | 5.10 | 4.90 | 4.80 | 14.00 | 13.80 | 13.20 | 40.00 | 36.00 | 32.19 | 380.00 | 358.00 | 333.00 | 190.02 | 167.90 | 152.25 | 11.31 | 11.99 | 12.68 |
| Check<br>SC128 | 5.30 | 4.75 | 4.55 | 15.50 | 14.00 | 13.50 | 42.00 | 40.00 | 37.40 | 380.00 | 364.00 | 326.00 | 215.00 | 190.00 | 170.00 | 12.79 | 13.57 | 14.16 |
| LSD<br>5%      | 0.43 |      |      | 0.70  |       |       | 1.76  |       |       | 13.57  |        |        | 7.61   |        |        | 0.56  |       |       |
| LSD<br>1%      | 0.57 |      |      | 0.92  |       |       | 2.31  |       |       | 17.86  |        |        | 10.02  |        |        | 0.74  |       |       |

**Table S2.** Physical and chemical soil properties for the two locations during 2018 season.

| Properties                                        | El-Mahmoudia | Kafrelsheikh |
|---------------------------------------------------|--------------|--------------|
| Sand %                                            | 16.9         | 16.56        |
| Silt %                                            | 26.5         | 23.64        |
| Clay %                                            | 56.5         | 59.8         |
| Soil texture                                      | Clay         | Clay         |
| Field capacity, %                                 | 40.8         | 41.8         |
| Wilting point, %                                  | 20.3         | 21.2         |
| Bulk density, Mg m <sup>-3</sup>                  | 1.24         | 1.38         |
| Organic matter, %                                 | 1.85         | 1.45         |
| CaCO <sub>3</sub> , %                             | 2.45         | 4.4          |
| pH*                                               | 7.65         | 8.0          |
| EC **, dS m <sup>-1</sup>                         | 1.06         | 1.88         |
| Ca <sup>++</sup> meq l <sup>-1</sup>              | 3.72         | 13.0         |
| Mg <sup>++</sup> meq l <sup>-1</sup>              | 2.08         | 12.3         |
| Na <sup>+</sup> meq l <sup>-1</sup>               | 12.8         | 30.1         |
| K <sup>+</sup> meq l <sup>-1</sup>                | 0.20         | 0.6          |
| CO <sub>3</sub> <sup>-</sup> meq l <sup>-1</sup>  | 0.00         | 0.0          |
| HCO <sub>3</sub> <sup>-</sup> meq l <sup>-1</sup> | 5.4          | 4.0          |
| CL <sup>-</sup> meq l <sup>-1</sup>               | 8.90         | 22.7         |
| SO <sub>4</sub> <sup>-</sup> meq l <sup>-1</sup>  | 4.5          | 29.3         |
| Available Nitrogen, mgkg <sup>-1</sup>            | 50.6         | 30.1         |
| Available phosphorus. mgkg <sup>-1</sup>          | 16.3         | 10.0         |
| Available potassium, mgkg <sup>-1</sup>           | 489.5        | 650          |

\* pH was determined in soil: water suspension (1:2.5)

\*\* EC was determined in soil paste extract

**Table S3. List of SSR primers and their sequences.**

| No. | Marker    | Forward primer               | Reverse primer           |
|-----|-----------|------------------------------|--------------------------|
| 1   | phi308707 | GCAACAAGATCCAGCCGAT          | GTCGCCCTCATATGACCTTC     |
| 2   | phi96100  | AGGAGGACCCCAACTCCTG          | TTGCACGAGCCATCGTAT       |
| 3   | phi453121 | ACCTTGCCTGTCCTTCTTCT         | CAAGCAAGACTTTTGATCAGCC   |
| 4   | phi072    | ACCGTGCATGATTAATTTCTCCAGCCTT | GACAGCGCGCAAATGGATTGAACT |
| 5   | phi024    | ACTGTCCACCAAACCAAGCCGAGA     | AGTAGGGGTTGGGGATCTCCTCC  |
| 6   | Umc1014   | GAAAGTCGATCGAGAGACCCTG       | CCCTCTTTCACCCCTTCCTT     |
| 7   | phi112    | TGCCCTGCAGGTTACATTGAGT       | AGGAGTACGCTTGGATGCTCTTC  |
| 8   | phi015    | GCAACGTACCGTACCTTTCCGA       | ACGCTGCATTCAATTACCGGGAAG |
| 9   | umc1033   | CTTCTTCGTAAAGGCATTTTGTGC     | GTGCGGGATTCCCTTAGTTTGC   |
| 10  | phi301654 | GAATGCATGCTTTTCAAGGAC        | CGCACAGAGAGCAGAACG       |

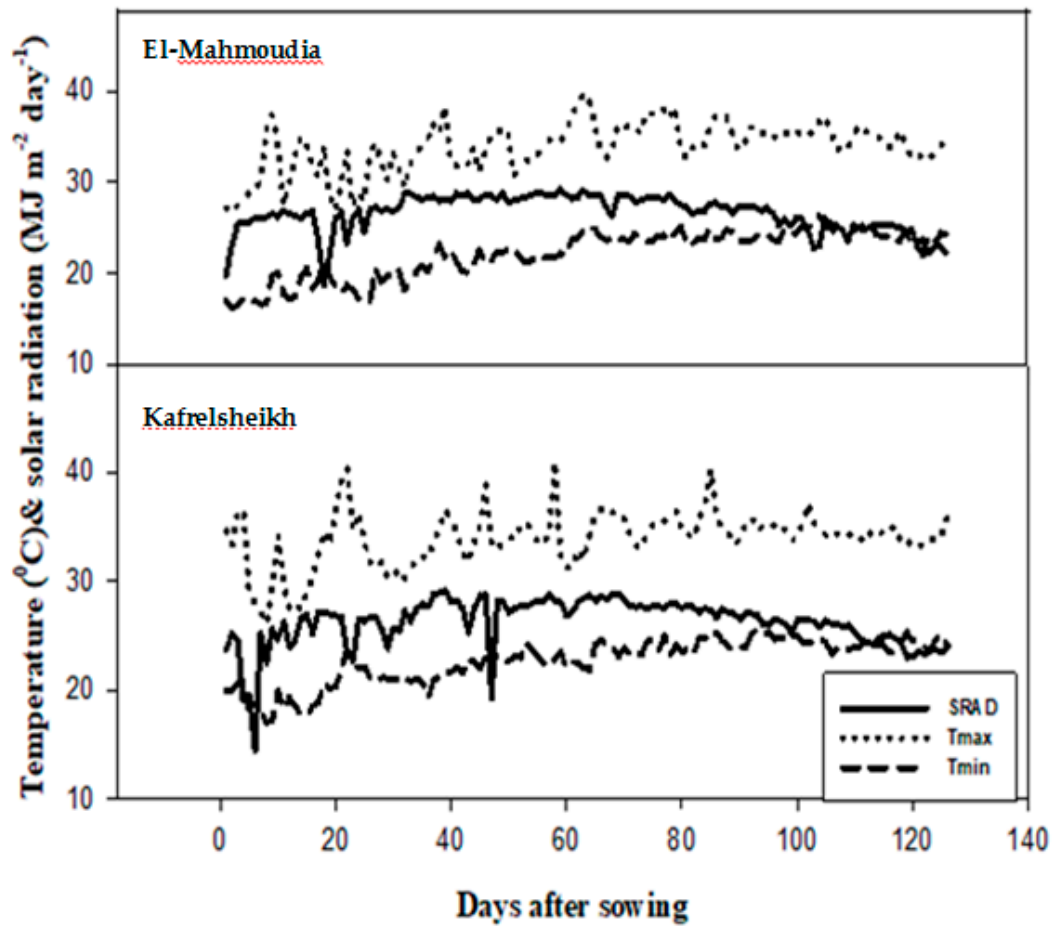

**Figure S1.** Daily maximum temperature (T max), minimum temperature (T min) and solar radiation (SRAD) for the two locations.
